# Supplementary material for: A Bead-Based Multiplexed Immunoassay to Evaluate Breast Cancer Biomarkers for Early Detection in Pre-Diagnostic Serum
Source: Int J Mol Sci. 2012 Oct 22;13(10):13587–604. doi: 10.3390/ijms131013587 (PMC3497343; doi:10.3390/ijms131013587)
Supplement: Supplementary file 1 [file ijms-13-13587-s001.pdf]

# Supplementary Information

**Table S1.** Characteristics of the subset.

|                                                                | Cases ( <i>n</i> = 24) | Controls ( <i>n</i> = 24) |
|----------------------------------------------------------------|------------------------|---------------------------|
| <b>Age at enrollment (years)</b>                               |                        |                           |
| Mean ±SD                                                       | 60.9 ± 5.2             | 60.9 ± 5.3                |
| <b>Age at menarche (years)</b>                                 |                        |                           |
| Mean ±SD                                                       | 13.7 ± 1.5             | 13.4 ± 1.7                |
| Missing                                                        | 1                      | 2                         |
| <b>Age at menopause (years)</b>                                |                        |                           |
| Mean ±SD                                                       | 49.4 ± 6.9             | 50.0 ± 4.6                |
| Missing                                                        | -                      | 1                         |
| <b>BMI</b>                                                     |                        |                           |
| Mean ±SD                                                       | 27.7 ± 3.4             | 26.5 ± 4.2                |
| Missing                                                        | 1                      | -                         |
| <b>Use of oral contraceptives, <i>n</i> (%)</b>                |                        |                           |
| No, but used to in the past                                    | 12 (50.0)              | 11 (45.8)                 |
| No, never                                                      | 12 (50.0)              | 13 (54.2)                 |
| <b>Duration of oral contraceptives use<sup>a</sup> (years)</b> |                        |                           |
| Median (IQR)                                                   | 10 (4–15)              | 6 (2–10)                  |
| <b>Use of HT, <i>n</i> (%)</b>                                 |                        |                           |
| No, but used to in the past                                    | 2 (8.3)                | 4 (16.7)                  |
| No, never                                                      | 22 (91.7)              | 20 (83.3)                 |
| <b>Duration of HT use<sup>a</sup> (years)</b>                  |                        |                           |
| Median (IQR)                                                   | 1.0 (4.5–8.0)          | 1.5 (1.0–8.0)             |
| <b>Ovariectomy, <i>n</i> (%)</b>                               |                        |                           |
| Both ovaries removed                                           | 1 (4.2)                | -                         |
| <b>Parity, <i>n</i> (%)</b>                                    |                        |                           |
| Nulliparous                                                    | 1 (4.2)                | -                         |
| <b>Number of children<sup>b</sup></b>                          |                        |                           |
| Median (IQR)                                                   | 2 (2–3)                | 3 (3–4)                   |
| <b>Smoking, <i>n</i> (%)</b>                                   |                        |                           |
| No, but used to in the past                                    | 12 (50.0)              | 10 (41.7)                 |
| No, never                                                      | 12 (50.0)              | 14 (58.3)                 |
| <b>Pack-years smoking until stop date<sup>c</sup></b>          |                        |                           |
| Median (IQR)                                                   | 3.8 (1.7–9.6)          | 3.4 (0.9–12.8)            |
| Missing                                                        | 1                      | 1                         |
| <b>Alcohol intake<sup>d</sup> (g/day)</b>                      |                        |                           |
| Median (IQR)                                                   | 3.0 (0.4–9.0)          | 0.5 (0.0–4.6)             |
| <b>Highest level of education<sup>e</sup>, <i>n</i> (%)</b>    |                        |                           |
| Level 1                                                        | 11 (45.8)              | 15 (62.5)                 |
| Level 2                                                        | 13 (54.2)              | 6 (25.0)                  |
| Level 3                                                        | 0 (0)                  | 3 (12.5)                  |

SD: standard deviation; BMI: body mass index; IQR: inter-quartile range; HT: menopausal hormone therapy. <sup>a</sup> Among former oral contraceptives/HT users. <sup>b</sup> Among women with children. <sup>c</sup> Among former smokers. <sup>d</sup> Energy-adjusted alcohol intake at enrollment. <sup>e</sup> Level 1 = primary education or lower vocational education, Level 2 = advanced elementary education or intermediate vocational education, Level 3 = higher general secondary education, higher vocational education or university.

**Table S2.** Characteristics of the serum samples in the subset.

|                                                                                              | Cases ( <i>n</i> = 24) | Controls ( <i>n</i> = 24) |
|----------------------------------------------------------------------------------------------|------------------------|---------------------------|
| <b>Serum sample storage duration</b> <sup>a</sup> (years)                                    |                        |                           |
| Mean ± SD                                                                                    | 11.4 ± 1.3             | 11.4 ± 1.3                |
| <b>Hours in refrigerator</b> <sup>b</sup>                                                    |                        |                           |
| Median (IQR)                                                                                 | 22 (20–23)             | 22 (19–23)                |
| <b>Days at –86 °C</b> <sup>c</sup>                                                           |                        |                           |
| Median (IQR)                                                                                 | 8 (5–21)               | 7 (5–21)                  |
| <b>Subjects use of medicines, minerals or vitamins last week</b> <sup>d</sup> , <i>n</i> (%) |                        |                           |
| Yes                                                                                          | 17 (70.8)              | 14 (58.3)                 |
| No                                                                                           | 7 (29.2)               | 10 (41.7)                 |
| <b>Time since last meal and/or drink of subject</b> <sup>d</sup> (minutes)                   |                        |                           |
| Median (IQR)                                                                                 | 122 (95–160)           | 131 (90–140)              |

SD: standard deviation; IQR: inter-quartile range. <sup>a</sup> Until experiment. <sup>b</sup> Between collection and centrifugation. <sup>c</sup> Between centrifugation and storage at liquid nitrogen. <sup>d</sup> At moment of blood collection

**Table S3.** Serum concentrations of all measured proteins in subset of cases diagnosed at 1<sup>st</sup> screening after inclusion and matched healthy controls.

|                     | Cases ( <i>n</i> = 24)       |             | Controls ( <i>n</i> = 24)    |             | Paired T test |
|---------------------|------------------------------|-------------|------------------------------|-------------|---------------|
| Biomarker           | Geometric mean concentration | 95%CI       | Geometric mean concentration | 95%CI       | p-value       |
| OPN (ng/mL)         | 1.21                         | 0.80–1.82   | 1.18                         | 0.65–2.15   | 0.96          |
| Haptoglobin (mg/mL) | 1.34                         | 0.91–1.96   | 1.10                         | 0.75–1.62   | 0.41          |
| CA15-3 (U/mL)       | 7.82                         | 5.83–10.49  | 9.02                         | 6.72–12.11  | 0.45          |
| CEA (ng/mL)         | 0.57                         | 0.43–0.75   | 0.44                         | 0.32–0.60   | 0.27          |
| CA-125 (U/mL)       | 1.99                         | 1.17–3.39   | 1.33                         | 0.77–2.30   | 0.28          |
| Prolactin (ng/mL)   | 3.66                         | 3.05–4.38   | 3.57                         | 2.57–4.97   | 0.90          |
| CA19-9 (U/mL)       | 1.83                         | 1.16–2.89   | 2.19                         | 1.50–3.21   | 0.53          |
| AFP (ng/mL)         | 0.37                         | 0.24–0.57   | 0.41                         | 0.27–0.63   | 0.69          |
| Leptin (ng/mL)      | 21.89                        | 17.02–28.15 | 18.45                        | 12.91–26.37 | 0.39          |
| MIF (pg/mL)         | 145.3                        | 101.8–207.5 | 204.1                        | 146.2–284.9 | 0.15          |

95%CI: 95% confidence interval; OPN: osteopontin; CA15-3: cancer antigen 15-3; CEA: carcinoembryonic antigen; CA-125: cancer antigen 125; CA19-9: cancer antigen 19-9; AFP:  $\alpha$ -fetoprotein; MIF: migration inhibitory factor.
